# Supplementary material for: Environmental versus dietary exposure to POPs and metals: A probabilistic assessment of human health risks
Source: Royal Society of Chemistry journal article supplement (doi:10.1039/b914962g), 2009-12-23
Supplement: b914962g.pdf [file b914962g.pdf]

## Electronic Supplementary Information

### Environmental *versus* dietary exposure to POPs and metals: A probabilistic assessment of human health risks

Victoria Linares,<sup>a,b</sup> Gemma Perelló,<sup>a</sup> Martí Nadal,<sup>a</sup> Jesús Gómez-Catalán,<sup>c</sup> Juan M. Llobet,<sup>c</sup> and José L. Domingo\*<sup>a</sup>

<sup>a</sup>Laboratory of Toxicology and Environmental Health, School of Medicine, IISPV, “Rovira i Virgili” University, Sant Llorenç 21, 43201 Reus, Catalonia, Spain. Fax: (34) 977-759322; Tel: (34) 977-759380; E-mail: joseluis.domingo@urv.cat

<sup>b</sup>Physiology Unit, School of Medicine, “Rovira i Virgili” University, Sant Llorenç 21, 43201 Reus, Catalonia, Spain.

<sup>c</sup>GRET-CERETOX, School of Pharmacy, Department of Public Health, University of Barcelona, Avgda. Joan XXIII s/n, 08028 Barcelona, Catalonia, Spain.

**Table S1** Monte-Carlo parameter distributions for environmental exposure assessment and risk characterization

| Parameter                                      | Units               | Type       | Distribution <sup>a</sup>                                       | Reference                             |
|------------------------------------------------|---------------------|------------|-----------------------------------------------------------------|---------------------------------------|
| Ventilation rate ( $V_T$ )                     | m <sup>3</sup> /day | log-normal | 16.57 ± 4.05                                                    | Allan et al. <sup>37</sup>            |
| Alveolar fraction retained in lungs ( $f_r$ )  | unitless            | triangular | 0.75 (0 - 1)                                                    | Nouwen et al. <sup>19</sup>           |
| Averaging time (AT)                            | year                | point      | 70                                                              | U.S. EPA <sup>40</sup>                |
| Exposure duration Adult (ED)                   | year                | log-normal | 11.36 ± 13.72                                                   | U.S. EPA <sup>40</sup>                |
| Exposed time fraction ( $E_t$ )                | unitless            | triangular | 0.62 (0 - 1)                                                    | Nouwen et al. <sup>19</sup>           |
| Body weight (BW)                               | kg                  | log-normal | 67.52 ± 12.22                                                   | Nadal et al. <sup>21</sup>            |
| Skin coverage with soil outside ( $Der_o$ )    | kg/m <sup>2</sup>   | triangular | 3.75·10 <sup>-2</sup> (0 - 0.1)                                 | Nouwen et al. <sup>19</sup>           |
| Matrix factor ( $f_m$ )                        | unitless            | triangular | 0.15 (0 - 1)                                                    | Nouwen et al. <sup>19</sup>           |
| Exposed skin surface area for arms ( $SA_o$ )  | m <sup>2</sup>      | log-normal | 0.319 ± 0.0461                                                  | U.S. EPA <sup>38</sup>                |
| Exposed time fraction outside ( $t_{fso}$ )    | unitless            | triangular | 0.158 (0 - 1)                                                   | Nouwen et al. <sup>19</sup>           |
| Skin coverage with soil inside ( $Der_i$ )     | kg/m <sup>2</sup>   | triangular | 5.6·10 <sup>-4</sup> (0 - 5·10 <sup>-3</sup> )                  | Nouwen et al. <sup>19</sup>           |
| Soil fraction in the inside dust ( $f_i$ )     | unitless            | triangular | 0.8 (0 - 1)                                                     | Nouwen et al. <sup>19</sup>           |
| Exposed skin surface area for hands ( $SA_i$ ) | m <sup>2</sup>      | log-normal | 0.084 ± 0.0127                                                  | U.S. EPA <sup>38</sup>                |
| Exposed time fraction inside ( $t_{fsi}$ )     | unitless            | triangular | 0.458 (0 - 1)                                                   | Nouwen et al. <sup>19</sup>           |
| Ingestion rate of soil particles ( $I_{sp}$ )  | kg/day              | triangular | 2.5·10 <sup>-5</sup> (1·10 <sup>-7</sup> - 5·10 <sup>-5</sup> ) | Nadal et al. <sup>21</sup>            |
| Sleeping time ( $t_s$ )                        | h/day               | triangular | 7.5 (3 - 14)                                                    | Unpublished data                      |
| Exposure frequency (EF)                        | day/year            | triangular | 345 (180-365)                                                   | Nadal et al. <sup>21</sup>            |
| Dermal absorption factor (inorganic) (ABS)     | unitless            | point      | 0.001                                                           | U.S. EPA <sup>39</sup>                |
| Adult surface area (SA)                        | unitless            | point      | 0.53                                                            | U.S. EPA <sup>38</sup>                |
| Adherence factor (AF)                          | mg/cm <sup>2</sup>  | log-normal | 0.52 ± 0.9                                                      | Nadal et al. <sup>21</sup>            |
| PCDD/F Tolerable Daily Intake (TDI)            | pg/kg/day           | uniform    | 1-4                                                             | Van Leeuwen et al. <sup>41</sup>      |
| PCDD/F Carcinogenic slope factor (SF)          | kg·day/ng           | uniform    | 3.4·10 <sup>-2</sup> - 5.6·10 <sup>-2</sup>                     | Katsumata and Kastenber <sup>42</sup> |

  

| Food group <sup>b</sup> | Units         | Type           | Distribution   | Non-consumer frequency |           |
|-------------------------|---------------|----------------|----------------|------------------------|-----------|
| Meat                    | g/day         | gamma*binomial | 143.6 ± 70.2   | 0.006                  |           |
| Fish                    | White fish    | g/day          | gamma*binomial | 34.0 ± 23.4            | 0.060     |
|                         | Blue fish     | g/day          | gamma*binomial | 24.7 ± 17.9            | 0.114     |
|                         | Cephalopod    | g/day          | gamma*binomial | 9.9 ± 7.9              | 0.230     |
|                         | Other seafood | Bivalve        | g/day          | gamma*binomial         | 5.5 ± 4.7 |
|                         | Crustacean    | g/day          | gamma*binomial | 6.9 ± 6.0              | 0.226     |
| Pulses                  | g/day         | gamma*binomial | 15.6 ± 10.2    | 0.050                  |           |
| Bread and cereals       | g/day         | gamma*binomial | 147.2 ± 78.8   | 0.000                  |           |
| Vegetables              | g/day         | gamma*binomial | 229.3 ± 146.4  | 0.003                  |           |
| Tubers                  | g/day         | gamma*binomial | 60.5 ± 39.6    | 0.021                  |           |
| Fruit                   | g/day         | gamma*binomial | 281.5 ± 195.1  | 0.015                  |           |
| Milk                    | g/day         | gamma*binomial | 253 ± 165.1    | 0.095                  |           |
| Dairy products          | g/day         | gamma*binomial | 112.5 ± 86.0   | 0.016                  |           |
| Eggs                    | g/day         | gamma*binomial | 23.3 ± 13.9    | 0.027                  |           |
| Bakery products         | g/day         | gamma*binomial | 39.5 ± 38.2    | 0.000                  |           |
| Oils and fats           | g/day         | gamma*binomial | 36.1 ± 20.6    | 0.002                  |           |

<sup>a</sup>Mean and standard deviation were used for log-normal distributions and gamma\*binomial; low and high for uniform distributions, and mean, low and high for triangular distributions.

<sup>b</sup>Distributions were adjusted from the Frequency and Quantity Questionnaire data of ENCAT.<sup>20</sup> The binomial factors were included to take into account the non-consumer people (non-consumer frequency).

**Table S2** Parameters for calculation of non-carcinogenic and carcinogenic risks

|                       | RfD <sub>o</sub><br>(mg/kg-day) <sup>-1</sup> | SF <sub>o</sub><br>(mg/kg-day) <sup>-1</sup> | IUR<br>(µg/m <sup>3</sup> ) <sup>-1</sup> | RfCi<br>(mg/m <sup>3</sup> ) |          |
|-----------------------|-----------------------------------------------|----------------------------------------------|-------------------------------------------|------------------------------|----------|
| HEAVY<br>METALS       | As                                            | 3.00E-04                                     | 1.50E+00                                  | 4.30E-03                     | 3.00E-05 |
|                       | Cd                                            | 1.00E-03                                     | -                                         | 1.80E-03                     | -        |
|                       | Cr                                            | 0.00E+00                                     | -                                         | -                            | -        |
|                       | Hg                                            | 0.00E+00                                     | -                                         | -                            | 3.00E-04 |
|                       | Mn                                            | 1.40E-01                                     | -                                         | -                            | 5.00E-05 |
|                       | Pb                                            | 0.00E+00                                     | -                                         | -                            | -        |
|                       | V                                             | 5.00E-03                                     | -                                         | -                            | -        |
| PAH                   | Naphthalene                                   | 2.00E-02                                     | -                                         | 3.40E-05                     | 3.00E-03 |
|                       | Acenaphthene                                  | 6.00E-02                                     | -                                         | -                            | -        |
|                       | Fluorene                                      | 4.00E-02                                     | -                                         | -                            | -        |
|                       | Anthracene                                    | 3.00E-01                                     | -                                         | -                            | -        |
|                       | Fluoranthene                                  | 4.00E-02                                     | -                                         | -                            | -        |
|                       | Pyrene                                        | 3.00E-02                                     | -                                         | -                            | -        |
|                       | Benzo(a)anthracene                            | -                                            | 7.30E-01                                  | 1.10E-04                     | -        |
|                       | Chrysene                                      | -                                            | 7.30E-03                                  | 1.10E-05                     | -        |
|                       | Benzo(k)fluoranthene                          | -                                            | 7.30E-02                                  | 1.10E-04                     | -        |
|                       | Benzo(a)pyrene                                | -                                            | 7.30E+00                                  | 1.10E-03                     | -        |
|                       | Indeno(123-cd)pyrene                          | -                                            | 7.30E-01                                  | 1.10E-04                     | -        |
| Dibenzo(ah)anthracene | -                                             | 7.30E+00                                     | -                                         | -                            |          |
| Benzo(b)fluoranthene  | -                                             | 7.30E-01                                     | 1.10E-04                                  | -                            |          |
| PCBs                  | PCB-118                                       | -                                            | 3.90E+00                                  | 1.10E-03                     | -        |
|                       | PCB-180                                       | -                                            | 1.30E+00                                  | 3.80E-04                     | -        |

RfD<sub>o</sub>: Oral Reference Dose; SF<sub>o</sub>: Oral Slope Factor; IUR: Inhalation Unit Risk; RfCi: Inhalation Reference Concentration

Data from US EPA<sup>37</sup>

**Table S3** Environmental (direct), dietary, and total exposure to POPs and metals for children living in Tarragona County (Catalonia, Spain)

|                                |         | Mean     | Median   | SD       | Percentiles |          |          |
|--------------------------------|---------|----------|----------|----------|-------------|----------|----------|
|                                |         |          |          |          | 75th        | 90th     | 95th     |
| PCDD/Fs<br>(ng WHO-TEQ/kg/day) | Direct  | 3.06E-05 | 9.61E-06 | 8.71E-05 | 2.49E-05    | 6.46E-05 | 1.19E-04 |
|                                | Dietary | 1.55E-03 | 1.47E-03 | 4.99E-04 | 1.81E-03    | 2.19E-03 | 2.49E-03 |
|                                | Total   | 1.59E-03 | 1.51E-03 | 5.14E-04 | 1.87E-03    | 2.25E-03 | 2.53E-03 |
| PCBs<br>(ng/kg/day)            | Direct  | 8.18E-02 | 3.13E-02 | 2.00E-01 | 7.15E-02    | 1.70E-01 | 3.05E-01 |
|                                | Dietary | 4.18E+00 | 3.75E+00 | 2.26E+00 | 5.27E+00    | 7.06E+00 | 7.75E+00 |
|                                | Total   | 4.26E+00 | 3.76E+00 | 2.31E+00 | 5.28E+00    | 7.20E+00 | 8.61E+00 |
| PCNs<br>(ng/kg/day)            | Direct  | 3.50E-03 | 2.31E-03 | 4.64E-03 | 3.99E-03    | 6.81E-03 | 1.01E-02 |
|                                | Dietary | 4.36E-01 | 1.41E-01 | 4.13E-01 | 5.89E-02    | 6.22E-01 | 7.01E-01 |
|                                | Total   | 4.38E-01 | 3.22E-01 | 4.01E-01 | 5.54E-01    | 8.75E-01 | 1.18E+00 |
| PAHs<br>(ng/kg/day)            | Direct  | 8.07E+00 | 5.22E+00 | 1.13E+01 | 9.06E+00    | 1.61E+01 | 2.32E+01 |
|                                | Dietary | 4.66E+02 | 4.46E+02 | 1.59E+02 | 5.53E+02    | 6.75E+02 | 7.65E+02 |
|                                | Total   | 4.72E+02 | 4.48E+02 | 1.58E+02 | 5.57E+02    | 6.76E+02 | 7.68E+02 |
| Carc. PAHs<br>(ng/kg/day)      | Direct  | 2.28E+00 | 1.18E+00 | 4.25E+00 | 2.33E+00    | 4.65E+00 | 7.52E+00 |
|                                | Dietary | 3.50E+01 | 3.35E+01 | 1.10E+01 | 4.10E+01    | 4.93E+01 | 5.55E+01 |
|                                | Total   | 3.73E+01 | 3.54E+01 | 1.21E+01 | 4.36E+01    | 5.27E+01 | 5.95E+01 |
| As<br>(mg/kg/day)              | Direct  | 1.37E-05 | 1.14E-05 | 9.65E-06 | 1.75E-05    | 2.57E-05 | 3.15E-05 |
|                                | Dietary | 4.58E-02 | 4.22E-02 | 1.84E-02 | 5.53E-02    | 6.98E-02 | 8.08E-02 |
|                                | Total   | 4.60E-02 | 4.27E-02 | 1.88E-02 | 5.52E-02    | 7.02E-02 | 8.15E-02 |
| Cd<br>(mg/kg/day)              | Direct  | 5.33E-07 | 4.54E-07 | 3.33E-07 | 6.71E-07    | 9.54E-07 | 1.16E-06 |
|                                | Dietary | 2.14E-03 | 2.04E-03 | 6.40E-04 | 2.49E-03    | 2.97E-03 | 3.31E-03 |
|                                | Total   | 2.14E-03 | 2.05E-03 | 6.34E-04 | 2.48E-03    | 2.98E-03 | 3.31E-03 |
| Cr<br>(mg/kg/day)              | Direct  | 4.22E-05 | 3.47E-05 | 2.92E-05 | 5.35E-05    | 7.90E-05 | 9.86E-05 |
|                                | Dietary | 3.83E-03 | 3.66E-03 | 1.25E-03 | 4.54E-03    | 5.40E-03 | 6.06E-03 |
|                                | Total   | 3.89E-03 | 3.69E-03 | 1.27E-03 | 4.58E-03    | 5.55E-03 | 6.23E-03 |
| Hg<br>(mg/kg/day)              | Direct  | 4.28E-05 | 3.35E-05 | 3.45E-05 | 5.46E-05    | 8.39E-05 | 1.08E-04 |
|                                | Dietary | 2.12E-03 | 1.95E-03 | 9.21E-04 | 2.60E-03    | 3.33E-03 | 3.84E-03 |
|                                | Total   | 2.17E-03 | 1.99E-03 | 9.28E-04 | 2.62E-03    | 3.36E-03 | 3.91E-03 |
| Mn<br>(mg/kg/day)              | Direct  | 6.56E-04 | 5.67E-04 | 4.11E-04 | 8.37E-04    | 1.18E-03 | 1.43E-03 |
|                                | Dietary | 1.49E-04 | 1.37E-04 | 6.17E-05 | 1.78E-04    | 2.29E-04 | 2.64E-04 |
|                                | Total   | 8.01E-04 | 7.19E-04 | 4.07E-04 | 9.91E-04    | 1.31E-03 | 1.56E-03 |
| Pb<br>(mg/kg/day)              | Direct  | 6.94E-05 | 5.22E-05 | 6.14E-05 | 8.70E-05    | 1.39E-04 | 1.84E-04 |
|                                | Dietary | 1.27E-02 | 1.21E-02 | 4.15E-03 | 1.49E-02    | 1.80E-02 | 2.01E-02 |
|                                | Total   | 1.27E-02 | 1.22E-02 | 4.10E-03 | 1.50E-02    | 1.82E-02 | 2.03E-02 |
| V<br>(mg/kg/day)               | Direct  | 6.13E-05 | 4.84E-05 | 4.90E-05 | 7.74E-05    | 1.16E-04 | 1.51E-04 |
|                                | Dietary | 1.93E-03 | 1.84E-03 | 6.27E-04 | 2.26E-03    | 2.75E-03 | 3.06E-03 |
|                                | Total   | 2.00E-03 | 1.91E-03 | 6.29E-04 | 2.34E-03    | 2.82E-03 | 3.18E-03 |
